1 **Non-linear phenotypic variation uncovers the emergence of**  
2 **heterosis in *Arabidopsis thaliana***

3 François Vasseur<sup>1,2,3\*</sup>, Louise Fouqueau<sup>2</sup>, Dominique de Vienne<sup>4</sup>, Thibault Nidelet<sup>5</sup>, Cyrille  
4 Violle<sup>2</sup> and Detlef Weigel<sup>1\*</sup>

5 <sup>1</sup>Max Planck Institute for Developmental Biology, D-72076 Tübingen, Germany

6 <sup>2</sup>CEFE, CNRS, Univ Montpellier, Université Paul Valéry Montpellier 3, EPHE, IRD,  
7 Montpellier, France

8 <sup>3</sup>Laboratoire d'Ecophysiologie des Plantes sous Stress Environnementaux (LEPSE), INRA,  
9 Montpellier SupAgro, UMR759, F-34060 Montpellier, France

10 <sup>4</sup>GQE–Le Moulon, INRA, Université Paris-Sud, CNRS, AgroParisTech, Université  
11 Paris-Saclay, 91190 Gif-sur-Yvette, France

12 <sup>5</sup>Sciences Pour l'Énologie, INRA, Université de Montpellier, Montpellier SupAgro,  
13 34060 Montpellier, France

14 \*Corresponding authors. Corresponding authors' addresses:

15 [franc.vasseur@gmail.com](mailto:franc.vasseur@gmail.com)

16 [weigel@weigelworld.org](mailto:weigel@weigelworld.org)

17 **Short title:** Allometric relationships and non-additive inheritance

## 18 **Abstract**

19 Heterosis describes the phenotypic superiority of hybrids over their parents in traits related to  
20 fitness. Understanding and predicting non-additive inheritance such as heterosis is crucial for  
21 evolutionary biology, as well as for plant and animal breeding. However, the physiological bases  
22 of heterosis remain debated. Moreover, empirical data in various species have shown that  
23 diverse genetic and molecular mechanisms are likely to explain heterosis, making it difficult to  
24 predict its emergence and amplitude from parental genotypes alone. In this study, we evaluated  
25 a model of physiological dominance proposed by Sewall Wright to explain the non-additive  
26 inheritance of metabolic fluxes at the cellular level. We used 450 hybrids derived from crosses  
27 among natural inbred accessions of *Arabidopsis thaliana* to test Wright's model for two fitness-  
28 related traits at the whole-plant level: growth rate and fruit number. We found that allometric  
29 relationships between traits constrain phenotypic variation in hybrids and inbreds to a similar  
30 extent. These allometric relationships behave predictably, in a non-linear manner, explaining up  
31 to 75% of heterosis amplitude, while genetic distance among parents at best explains 7%. Thus,  
32 our findings are consistent with Wright's model of physiological dominance on plant  
33 performance, and suggest that the emergence of heterosis is an intrinsic property of non-linear  
34 relationships between traits. Furthermore, our study highlights the potential of a geometric  
35 approach of phenotypic relationships for predicting heterosis of two major components of crop  
36 productivity and yield.

37 **Key Words:** Heterosis; hybrid vigour; molecular dominance; non-linear relationships; biomass;  
38 metabolic scaling; non-additive inheritance; allometry; genetic distance; phenotypic distance;  
39 growth rate; fruit production; yield; phenotypic integration; physiology; predictive model.

## 40 Introduction

41 If the inheritance of phenotypic traits was always additive, progenies will always exhibit  
42 intermediate trait values compared to their respective parents. Pure genetic additivity is,  
43 however, the exception rather than the rule in intraspecific crosses. Non-additive inheritance has  
44 been exploited for decades in agronomy [1,2], although the underlying mechanisms remain a  
45 major question for evolutionary genetics and crop science [2,3]. In plants, hybrid vigour or  
46 heterosis has been frequently observed [4–9], and its molecular bases have been investigated in  
47 numerous studies [9–13]. Unfortunately, empirical observations often led to contrasting  
48 conclusions, and none of the proposed genetic mechanisms can fully explain the emergence of  
49 heterosis of different traits across all study systems [9,14–19]. Thus, we are still lacking a  
50 unifying theoretical corpus that enables us to explain and predict heterosis of fitness-related  
51 traits, including biomass, growth rate and reproductive success.

52 Several genetic hypotheses have been proposed to explain heterosis [3,10,13,20].  
53 According to the ‘dominance hypothesis’, each parent contributes favourable, dominant alleles  
54 (generally at many loci) that together complement the deleterious effects of recessive alleles  
55 originating from the other parent. The ‘overdominance hypothesis’ postulates the existence of  
56 loci where the heterozygous state ( $Aa$ ) is superior to both homozygotes ( $AA$  or  $aa$ ). With  
57 overdominance, the emergence of a hybrid superior to its best parent could depend on a single  
58 locus. Pseudo-overdominance corresponds to cases where dominant, favourable alleles are in  
59 linkage with recessive, unfavourable alleles, so that the heterozygous combinations appear to  
60 behave as overdominant loci. The picture is further complicated by the contributions of epistasis  
61 [15,21] and epigenetics [12,22] to heterosis in plants.

62 To tease apart the different hypotheses, quantitative trait locus (QTL) mapping has been  
63 carried out in many species [5,9,15,17,21,23]. In general, individual studies differ strongly in  
64 their conclusions regarding the underlying genetic mechanisms, apparently depending on the  
65 investigated traits, the genetic material used, the mating system, and the experimental

66 constraints related to the number of crosses necessary for robust statistical inference (*e.g.*, diallel  
67 mating design) [13,19,20]. In addition, the QTL approach performs poorly to detect small-effect  
68 loci [24]. Yet, it has been shown that fitness-related traits such as growth rate, size and fruit  
69 production are often controlled by a large number of genes, which individually may have very  
70 weak effects [25–27].

71 Because of the polygenic nature of fitness-related traits, heterosis is expected to be  
72 associated with molecular dominance, and should positively correlate with genetic distance  
73 between parents, at least up to a certain extent [28–30]. Some findings are consistent with this  
74 hypothesis [31–33], suggesting that parental genetic distance could be used to quantitatively  
75 predict heterosis in plants. Unfortunately, experimental studies generally employ for practical  
76 reasons only a relative small number of crosses and parental lines [7,34], which makes it difficult  
77 to generalize the findings of individual studies. In recent work, Seymour and colleagues [13]  
78 investigated heterosis in a half-diallel between 30 genome-sequenced accessions of *Arabidopsis*  
79 *thaliana* collected from diverse Eurasian populations [35]. As expected under the dominance  
80 model [28–30], they found a positive correlation between parental genetic distance and  
81 heterosis. However, genetic distance between parents only accounted for less than 3% of  
82 heterosis among *A. thaliana* hybrids, making predictions based on genetic distances alone  
83 strongly uncertain.

84 Strikingly, many continue to consider the physiological bases of heterosis a mystery  
85 [36,37]. An alternative to genetics-first studies in order to understand and predict heterosis is to  
86 consider the physiological constraints that determine phenotypic variation across organisms. As  
87 early as 1934, Sewall Wright proposed a model of physiological dominance to explain the  
88 maintenance of recessive alleles in natural populations [38]. Wright began with the universal  
89 relationship that connects the concentration of enzymes to the metabolic flux that results from  
90 their activity (Fig. 1). Since the relationship between these two traits is concave with a  
91 horizontal asymptote (*e.g.*, Michaelis-Menten kinetics), dominance of metabolic flux is expected  
92 even if enzyme concentrations are additive and hybrids intermediate between their parents (Fig.

93 1). Modern knowledge of metabolic networks was incorporated into this model by Kacser and  
94 Burns in 1981 [39], but Wright's model of dominance has otherwise received little attention in  
95 the heterosis literature. Recently, Fiévet and colleagues [40,41] evaluated Wright's model with a  
96 focus on the relationship between metabolic flux and enzyme activity in the chain of glycolysis  
97 in yeast. They modelled the importance of the curvature of the relationship between enzyme  
98 concentration and metabolic flux in the emergence of heterosis on glycolysis output [40]. This  
99 approach has considerable promise for predicting the phenotype of hybrids by considering the  
100 non-linear relationships that often link phenotypic traits with each other. However, these  
101 theoretical expectations remain to be tested on more complex traits, as well as on multicellular  
102 organisms such as plants, with potentially major perspectives for cultivated species.

103 Many phenotypic relationships exhibit non-linear geometries, notably between fitness-  
104 related traits [42,43]. These relationships are analogous to those between metabolic and  
105 enzymatic activities described by Wright [38], Kacser and Burns [39], and Fiévet and colleagues  
106 [40,41]. In particular, comparative ecology studies have demonstrated the existence of non-  
107 linear allometric relationships between the biomass of an organism and its morphology,  
108 physiology and metabolism [42,44–46]. Allometric relationships often take the form of a  
109 function  $Y = \alpha M^\beta$ , where  $Y$  is a morphological or physiological trait (*e.g.*, respiration rate, growth  
110 rate, leaf area, reproductive biomass) that can be predicted by  $M$ , the biomass of the organism, a  
111 constant  $\alpha$  and the allometric exponent  $\beta$  [44,47]. The allometric exponent of many traits  
112 exhibits a value less than one, causing a concavity of the relationship (called 'strict allometry'  
113 [42]). Allometric relationships are usually linearized by logarithmic transformation, especially to  
114 compare exponent values (slope of the log-log relationship) between organisms [48]. For  
115 instance, the metabolic scaling theory predicts that the allometric exponent is a multiple of a  
116 quarter (*e.g.*,  $\frac{1}{4}$ ,  $\frac{3}{4}$ ) for many biological processes such as respiration rate, hydraulic resistance,  
117 carbon fluxes, biomass allocation and growth rate [44,46,49–51]. Recent studies with plants  
118 [43,52] suggest that the exponent must be corrected for the organism's biomass because it is  
119 linked to the adaptive diversification of plant metabolism [27].

120 In this study, we tested, inspired by Wright's model of physiological dominance for  
121 enzyme concentration and metabolic flux [38], whether non-linear allometric relationships can  
122 explain the emergence of heterosis in macroscopic traits related to performance, such as growth  
123 rate and fruit production. We used the plant *A. thaliana*, which is not a crop, but has been used  
124 for many genetic studies of heterosis [7,13,53–56]. This species is characterized by a high rate of  
125 inbreeding, which leads to a high rate of homozygosity in natural populations [57,58]. The  
126 complete sequencing of 1,135 natural accessions [59] has provided abundant information on the  
127 extent of genetic variation between populations, the genotype-phenotype map of the species, as  
128 well as the causes of phenotypic variation in intraspecific hybrids [60–64]. Furthermore,  
129 allometric relationships that link growth rate and fruit production to plant biomass have been  
130 evaluated in this species [27,52,65]. Here, we specifically addressed the following two questions:  
131 (i) Are there non-linear allometric relationships that similarly constrain trait variation in natural  
132 accessions and hybrids? And (ii) do these non-linear relationships explain the emergence and  
133 extent of heterosis in growth rate and fruit production? To this end, we compared several traits  
134 between 451 inbred accessions representing a wide range of native environments and 450  
135 crosses derived from crosses among 415 of these accessions. Our results are consistent with  
136 many aspects of Wright's model, suggesting that heterosis emerges intrinsically from the non-  
137 linear relationships between traits.

## 138 **Results**

### 139 **Trait variation and heterosis in a wide range of *A. thaliana* genotypes**

140 We generated 450 hybrids by manual crosses between 415 inbred accessions (Fig. 2A). We then  
141 measured four traits, vegetative dry mass, plant lifespan, growth rate and total fruit number, in  
142 the 450 hybrids, the 415 inbred parents, plus a further 35 inbred accessions. The parental  
143 combinations for the hybrids had been chosen to represent a wide range of genetic, geographic  
144 and phenotypic distances (Fig. 2B,C).

145 Traits were strongly variable between genotypes: vegetative dry mass  $M$  varied between  
146 1.3 and 2,218 mg, plant lifespan between 24 and 183 days, growth rate between 0.04 and 40.4  
147  $\text{mg d}^{-1}$ , and fruit number between 5 and 400 (Table S1). Across the entire dataset of hybrids and  
148 inbreds, a high proportion of the phenotypic variance could be explained by genotypic  
149 differences (broad-sense heritability): from 80% for growth rate to 94% for vegetative dry mass  
150 (Table S2). We found similar ranges of variation for both inbreds and hybrids (Fig. 3). For  
151 instance, standard deviation of plant lifespan was 19.8 days across inbreds, and 20.1 days across  
152 hybrids (Table S2). Hybrids were on average not significantly different from inbreds ( $P > 0.01$   
153 for all traits, Table S2).

154 Despite the similar distribution of trait values for inbreds and hybrids, we found  
155 significant heterosis for all traits. This was measured by the discrete categorization of hybrid  
156 phenotypic class based on the comparison of hybrid trait distribution with both mid-parent  
157 values and highest ('best') or lowest ('worst') parent values. There was both positive and  
158 negative heterosis (Fig. 3). However, the extent and direction of heterosis was variable between  
159 traits. For instance, 21% of hybrids had confidence intervals (CIs) for lifespan that significantly  
160 differed from both or mean parental value, and thus, were considered as significantly heterotic.  
161 By contrast, 56% of hybrids were heterotic for vegetative dry mass. In general, there was more  
162 negative than positive heterosis, specifically for vegetative dry mass (46% of hybrids). Thus,  
163 hybrids represent a similar phenotypic space as natural inbred accessions, and the emergence of  
164 heterosis in our data did not simply reflect a few exceptional hybrids that outperformed all  
165 inbreds.

### 166 **Similar non-linear allometric relationships in accessions and hybrids**

167 In this study, we focused on two traits with important evolutionary and agronomic outcomes:  
168 growth rate and fruit number. As predicted by ecological theory, these two traits exhibited non-  
169 linear allometric relationships with vegetative dry mass (Fig. 4). Consistent with recent studies  
170 of plant allometry [27,43,52], growth rate could be modelled by a power-law function with  
171 mass-corrected exponent ( $g(M)$ , Table 1), with a concave curvature (Fig. 4A). By contrast, fruit



172 number exhibited a right-skewed bell-shaped relationship (Fig. 4B). We modelled this allometric  
173 relationship with an inverse quadratic function ( $f(M)$ , Table 1). Importantly, inbreds and hybrids  
174 exhibited similar non-linear relationships, characterized by coefficients that were not  
175 significantly different from each other (with overlapping 95% CIs; Table 1).

### 176 **Relationships between heterosis and genetic, phenotypic and geographic distances**

177 We first compared what fraction of heterosis could be explained by genetic and phenotypic  
178 distances between inbred parents. For all hybrids, we quantified heterosis as the observed  
179 phenotypic deviation relative to mid-parent value (MPH), and best parental value (BPH).  
180 Pairwise genetic distances were calculated either with all SNPs in the genome, or with SNPs in  
181 the 1% top-genes associated with the corresponding trait [27]. For the phenotypic distance, we  
182 used the absolute difference in vegetative dry mass between parents.

183 We found that genetic distance between parents was positively correlated with heterosis  
184 of growth rate (both MPH and BPH  $P < 0.001$ ; Fig. 5A). However, genetic distance only  
185 accounted for less than 10% of heterosis (7% and 6% for MPH and BPH, respectively).  
186 Phenotypic distance was also poorly correlated with heterosis of growth rate, and only with  
187 MPH ( $r^2 = 0.03$ , Fig. 5B). By contrast, genetic distance did not correlate with heterosis of fruit  
188 number (both  $P > 0.01$ , Fig. 5C), while phenotypic distance was negatively correlated, albeit  
189 poorly, with BPH ( $r^2 = 0.05$ , Fig. 5D). Using only the 1% top-genes associated with growth rate  
190 and fruit number, which are more likely to have a causal role in the measured traits, did not  
191 improve correlations ( $r^2 < 0.10$ ). Even when combined in a multivariate model, genetic and  
192 phenotypic distances together explained less than 10% of heterosis of growth rate and fruit  
193 number (Table S3). For comparison, geographic distance between parents explained less than  
194 2% of heterosis of fruit number, and less than 0.2% of heterosis of growth rate. In summary,  
195 none of the parental distances – be they genetic, phenotypic or geographic – had much power to  
196 explain and predict a significant portion of heterosis.



## 197 **Explaining variation in heterosis by phenotypic non-linearity**

198 In a second approach, we used the fitted equations (Table 1) to take into account the non-  
199 linearity of allometric relationships and to predict heterosis. Our first goal was to predict growth  
200 rate and fruit number with (i) the allometric relationship fitted on parents, and (ii) the  
201 measurement of vegetative dry mass in hybrids (Fig. 6). Predicted growth rate in hybrids  
202 strongly correlated with observed growth rate ( $r^2 = 0.95$ , Fig. S1A). By contrast, predicted fruit  
203 number was poorly correlated with observed trait values ( $r^2 = 0.08$ , Fig. S1B). This is consistent  
204 with the larger dispersion of trait values around the fitted curve for fruit number (Fig. 4B)  
205 compared to growth rate (Fig. 4A). We then compared trait deviation predicted in hybrids by  
206 non-linearity of traits – relative to the predicted mid-parent value ( $PNL_{MP}$ ) and to the predicted  
207 best-parent value ( $PNL_{BP}$ ) – with the observed MPH and BPH (Fig. 6). Observed heterosis and  
208 predicted non-linearity of growth rate were strongly correlated ( $r^2 = 0.75$  and  $0.66$  for  $PNL_{MP}$  vs  
209 MPH and  $PNL_{BP}$  vs BPH, respectively, Fig. 6B). Observed heterosis and predicted phenotypic  
210 non-linearity of fruit number were also positively correlated, although weaker than for growth  
211 rate ( $r^2 = 0.14$  and  $0.10$  for  $PNL_{MP}$  vs MPH and  $PNL_{BP}$  vs BPH, respectively, Fig. 6D). This  
212 suggests that allometric relationships allow the prediction of heterosis amplitude, and that  
213 prediction accuracy depends on the strength of the underlying non-linear covariation between  
214 traits.

## 215 **Discussion**

216 Already in 1934, Wright wrote in his seminal paper that “dominance has to do with the  
217 physiology of the organism and has nothing to do with the mechanism of transmission” [38].  
218 Eighty years later, the emergence of heterosis is still considered as an enigma and its  
219 physiological bases remain debated. Despite the many dominant, overdominant and epistatic  
220 QTL identified in a plethora of species [19,20,36], none of the genetic models has been formally  
221 validated in more than a few cases [*e.g.*, 9]. Here, we approached the question of heterosis from  
222 a physiological angle based on a geometric analysis of trait-trait relationships. Combining the

223 ideas put forth by Wright [38] with principles from allometric theory [44,51], we demonstrate  
224 that a significant part of heterosis can be explained by the non-linear relationships that link  
225 phenotypic traits with each other.

226 The accuracy of heterosis prediction with phenotypic non-linearity depends on how  
227 strongly traits correlate with each other. Metabolic scaling theory [44,46,66] postulates that  
228 body size constrains trait variation in the form of universal mathematical laws. According to the  
229 postulates of this theory, biomass determines the number of metabolically active units (cells,  
230 mitochondria), which in turn determine physiological fluxes, biomass partitioning and growth  
231 rate at the organismal level [51,67]. In agreement, we have found that hybrids exhibit the same  
232 allometric relationships as natural inbred accessions. This reinforces the idea of strong and  
233 predictable constraints on phenotypic variation, specifically on variation of growth rate. Our  
234 results further indicate that the shape of phenotypic non-linearity is important for the emergence  
235 of heterosis [40]. For instance, a severe concavity is expected to be favourable to the emergence  
236 of best-parent heterosis, as we have observed for fruit number. By contrast, phenotypic  
237 convexity with a trait at lower integration level, for instance a trait related to organism  
238 development and organization plan, could potentially lead to negative heterosis. This could  
239 notably explain the high fraction of negative heterosis observed here for plant biomass, which is  
240 consistent with previous findings in *A. thaliana* [13,54], although it contrasts with some others  
241 [7,56]. It is also consistent with results in rice [17,68], an inbreeding crop species used for the  
242 development of heterotic hybrids. In addition to phenotypic convexity, another explanation to  
243 the emergence of negative heterosis is that we used crosses from strongly divergent accessions,  
244 which might exhibit incompatibilities between defence-related genes [69-72]. Indeed,  
245 autoimmunity has been repeatedly observed when crossing distant accessions of *A. thaliana* [64].  
246 This is also consistent with recent findings, where positive heterosis for biomass seems to be  
247 linked to a general repression of the immune system in *A. thaliana* hybrids [56].

248 The genetic bases of fitness-related traits such as growth rate and fruit production are  
249 complex by nature, because these traits result from the effects of numerous genes acting on

250 different components of performance [26,73]. Inexpensive high-density genotype information  
251 coupled with very detailed phenotyping provides a series of promising avenues for the genomic  
252 prediction of heterosis [74]. In this context, the dominance hypothesis implicates, within certain  
253 limits, a positive relationship between parental genetic distance and heterosis [28,29]. Results  
254 from a range of species, however, do not conform with these expectations [7,13,34,75,76]. One  
255 of the reasons could be the often small number of crosses and the relatively small range of  
256 genetic distances analysed, with the latter holding true especially in cultivated species [7]. Our  
257 results with 450 hybrids representing crosses between diverse *A. thaliana* populations pointed to  
258 a positive but weak correlation between heterosis and parental genetic distance for growth rate,  
259 but no such correlation for fruit number. This suggests that a genetic approach alone may not be  
260 sufficient to accurately predict heterosis. Importantly, genetic distances calculated from the  
261 genes enriched for the ones likely to have major effect on growth rate [27] did not improve our  
262 ability to predict heterosis.

263 Wright's model of physiological dominance [38] was based on the non-linear  
264 relationship that connects two traits at different levels of integration, enzyme concentration and  
265 metabolic fluxes. In evolutionary biology, a trait is said to be "integrated" when it is closely  
266 associated with the fitness of the organism, which in plants typically includes growth rate and  
267 fruit number [77]. This leads to a pyramidal view of phenotypic integration [77,78], with fitness-  
268 related traits at the top being under the control of several, less integrated traits (*e.g.*, biomass,  
269 phenology, morphology), which themselves are under the control of many other traits (*e.g.*,  
270 metabolic and physiological fluxes, cellular activity), and so on, until traits supposed to be  
271 additive such as enzyme concentrations. Under the hypothesis of additivity of enzyme  
272 concentration, Wright's model has been shown to accurately predict heterosis of metabolic  
273 output in the chain of glycolysis [40]. In our study, we have shown that even when vegetative  
274 dry mass exhibited important deviation from additivity, it could still be used to predict heterosis  
275 of growth rate and fruit number based on parental allometric relationships. This finding  
276 demonstrates the performance of the phenotypic approach relative to the purely genetic  
277 approach to explain and predict heterosis. For instance, our method explained up to 75% of

278 heterosis amplitude for growth rate (Fig. 6B) while genetic distance at best explained only 7%  
279 (Fig. 5A). Although our approach is not incompatible with the genetic models of molecular  
280 dominance, it outperforms these in its ability to predict the direction and amplitude of heterosis  
281 in the natural inbred species *A. thaliana*.

282 Evolutionary theory suggests that the intensity of inbreeding depression, and hence the  
283 potential for heterosis, should increase with the level of phenotypic integration [79]. Consistent  
284 with this, survival and fertility in animals are more sensitive to inbreeding depression than traits  
285 at lower levels of integration such as size, biomass and gross morphology [80]. Our findings are  
286 consistent with the idea that fitness-related traits exhibit more heterosis because they result from  
287 the multiplicative effects of non-linear relationships at different levels of phenotypic integration  
288 [48,73,81]. These non-linear relationships can have different curvatures and directions, which  
289 might either amplify or cancel each other.

290 From a theoretical point of view, the predominance of outcrossing and the maintenance  
291 of recessive alleles among organisms have been suggested to be directly linked to non-additive  
292 inheritance and superior performance of hybrids [82]. Wright's initial model of physiological  
293 dominance was proposed as a response to Fisher's idea that 'gene modifiers of dominance' must  
294 exist and be selected to maximize the fitness of the heterozygote [83]. Wright [38], and later  
295 Kacser and Burns [39], claimed that modifiers are not necessary, because non-linearity is an  
296 intrinsic characteristic of metabolic networks. The same argument holds true for complex traits  
297 such as growth rate and fruit number. The assumption of modifiers of dominance is based on  
298 the unrealistic expectation of an intermediate phenotype in the heterozygote, while phenotypic  
299 relationships are essentially non-linear [40,48,84]. A next step in getting to the physiological  
300 root of heterosis will be the integration of other, more low-level traits, especially gene expression  
301 and metabolite levels. We expect that this will improve the characterization of non-linear  
302 relationships in multidimensional phenotypic space, and ultimately shed lights on the  
303 physiological mechanisms at the origin of non-additive inheritance.

## 304 **Conclusions**

305 The development of a predictive approach for heterosis represents a long-term goal of modern  
306 biology, especially in the applied framework of varietal selection in crops [85]. Our study  
307 highlights the power of a geometric approach of trait-trait relationships for explaining heterosis  
308 in two major components of plant productivity and yield. This in turn opens avenues for  
309 targeting optimal crosses based on allometric relationships in parental lines. That trait variation  
310 is similarly constrained in accessions and hybrids suggests that hybrids outperforming all  
311 accessions in a specific trait are the exception, although they generally outperform their specific  
312 parents. It is now time to test the phenotypic approach to heterosis in cultivated species, for  
313 which the study of allometric relationships is a nascent research front [86–88].

## 314 **Material and Methods**

### 315 **Plant material**

316 451 accessions of *Arabidopsis thaliana* were phenotyped in 2014 at the Max Planck Institute for  
317 Developmental Biology in Tübingen (MPI-Tübingen), Germany ( $n = 2$ , Exp1) [27,89]. 415  
318 accessions were used as parental lines of the 450 hybrids phenotyped in a second experiment in  
319 2015 at MPI-Tübingen ( $n = 4$ , Exp2). 342 accessions were used as female parent and 318 as  
320 male parent. 407 accessions among the 451 total, and 369 accessions among the 415 parental,  
321 had been genome sequenced as part of the 1001 Genomes project (<http://1001genomes.org/>)  
322 [59]. Among the 415 parental accessions, 134 (32%) were used in a single cross, 166 (40%) were  
323 used in two crosses, 63 (15%) in three crosses, and 52 (13%) in at least four crosses. To  
324 overcome potential maternal effects, the same mother plants grown in the greenhouse in 2013  
325 provided the seeds for both the inbreds (by self-fertilization) and the hybrids (by manual cross)  
326 (Fig. S2A).

## 327 **Growth conditions**

328 We designed a hydroponic system where plants were cultivated on inorganic solid media  
329 (rockwool) and all nutrients were provided through the watering solution. 4.6 cm (diameter) x 5  
330 cm (depth) circular pots (Pöppelmann, Lohne, Germany) were filled with 3.6 cm x 3.6 cm x 4  
331 cm depth rockwool cubes (Grodan cubes, Rockwool International, Denmark). Pots were  
332 covered with a black foam disk with a 5-10 mm central circular opening. Seeds were sown in  
333 individual pots, randomly distributed in trays of 30 pots each (Fig. S2B).

334 Before sowing, all seeds were surface-sterilized with 100% ethanol and frozen overnight  
335 at -80 °C to kill any insect eggs. The rockwool cubes were placed in 75% strength nutrient  
336 solution as described in ref. [90] in order to achieve full humidification and fertilization. After  
337 sowing on the surface of the rockwool cubes, trays with 30 pots each were incubated for two  
338 days in the dark at 4°C for stratification. Trays were transferred for 6 days to 23°C (8 h day  
339 length) for germination. After 6 days, when most seedlings had two cotyledons, trays were  
340 transferred to 4°C (8 h light) for 41 days of vernalization, in order to reduce the range of  
341 flowering times among accessions. During germination and vernalization, all trays were  
342 watered once a week with a 75% strength nutrient solution. After vernalization, when true  
343 leaves had emerged on most individuals, plants were thinned to one individual per pot, and  
344 trays were moved to the Raspberry Pi Automated Plant Analysis (RAPA) facility [89] (Fig.  
345 S2B), set to 16°C, air humidity at 65%, and 12 h day length, with a PPFD of 125 to 175  $\mu\text{mol m}^{-2}$   
346  $\text{s}^{-1}$  provided by a 1:1 mixture of Cool White and Gro-Lux Wide Spectrum fluorescent lights  
347 (Luxline plus F36W/840, Sylvania, Germany). Trays were randomly positioned in the room,  
348 and watered every 1 to 3 days with 100% strength nutrient solution.

## 349 **Trait measurement**

350 Plants were grown and phenotyped using rigorously the same protocol, following  
351 methodologies previously published for inbred accessions [27,89]. Plants were harvested at the  
352 end of the life cycle when the first fruits were senescing. Rosettes were separated from roots and  
353 reproductive parts, dried at 65° C for three days and weighed. Plant lifespan (d) was measured

354 as the duration between the appearance of the two first leaves after vernalization and the end of  
355 the life cycle [89]. Growth rate ( $\text{mg d}^{-1}$ ) was calculated as the ratio of final rosette dry mass over  
356 plant lifespan. Inflorescences were photographed with a high-resolution, 16.6 megapixel SLR  
357 camera (Canon EOS-1, Canon Inc., Japan), and analysed with ImageJ [91] to estimate the  
358 number of fruits through 2D image skeletonization, following published protocols [27,89].

359 The RAPA system was used for daily imaging using 192 micro-cameras (OmniVision  
360 OV5647), which simultaneously acquired 6 daily top-view 5-megapixel images for each tray  
361 during the first 25 days after vernalization. We used a published method to estimate plant dry  
362 mass during ontogeny from top-view rosette pictures [27,89]. From fitted sigmoid growth curves  
363 on all individuals, we calculated inflection point (d) at which daily growth was maximal and  
364 started to decrease. We used rosette dry mass (mg) at the inflection point as measurement of  
365 vegetative dry mass  $M$  (mg). In total, trait values for plant lifespan, growth rate and vegetative  
366 dry mass were available on 451 inbreds and 447 hybrids, and fruit number on 441 inbreds and  
367 449 hybrids (Table S1).

368 To correct for potential biases between the two experiments performed, 16 accessions  
369 phenotyped in Exp1 were also included in Exp2. Among all traits measured, only plant lifespan  
370 exhibited a significant difference between the two experiments ( $P = 0.03$ ). We thus corrected  
371 trait values in Exp2 with the following equation:  $\text{Lifespan}_{\text{corrected}} = -37 + 1.8 * \text{Lifespan}_{\text{observed}}$ .

## 372 **Measurement of heterosis**

373 First, hybrid phenotypic classes were categorized by comparing trait distribution in hybrids to  
374 mean and best (or worst) parental values. We used 95% confidence intervals (CI) among the  
375 four hybrid replicates of each F1 for categorization, as follows: (i) below worst-parent if CI of  
376 the trait measured in the hybrid was strictly inferior to the minimum trait value among the two  
377 parental genotypes; (ii) below mean-parent if the hybrid CI was strictly inferior to mean parental  
378 value but overlapped with minimum parent; (iii) above mean-parent if the hybrid CI was strictly



379 superior to mean parental value (but not best parent); (iv) above best-parent if the hybrid CI was  
380 strictly superior to maximum parental value.

381 Secondly, two metrics commonly used in the literature to quantify heterosis [13] were  
382 calculated in the present study for all traits,  $Y$ , *i.e.* growth rate and fruit number:

383 1) Mid-Parent Heterosis (MPH), the deviation of observed hybrid value scaled to observed  
384 mean parental value:

$$385 \quad \text{MPH} = (Y_{1 \times 2} - \text{mean}(Y_1, Y_2) / \text{mean}(Y_1, Y_2)$$

386 2) Best-Parent Heterosis (BPH), the deviation of observed hybrid value scaled to observed  
387 best parental value:

$$388 \quad \text{BPH} = (Y_{1 \times 2} - \max(Y_1, Y_2) / \max(Y_1, Y_2)$$

### 389 **Allometric relationships and measurement of phenotypic non-linearity**

390 The allometric equations were fitted by the non-linear least-squares method using the *nls*  
391 function in R [92]. Based on allometric theory [27,43,44,52], we chose a power-law equation for  
392 growth rate with a mass-corrected allometric exponent ( $g(M)$  in Table 1). The corrected  
393 exponent corresponds to the derivative of the quadratic function obtained after logarithmic  
394 transformation of the allometric relationship [27,43,52]. In our data, biomass-correction of the  
395 exponent improved the fitting of the allometric relationship of growth rate ( $\Delta\text{AIC} = 83$ ). For the  
396 allometric relationship of fruits number, we chose an inverse polynomial equation ( $f(M)$  in Table  
397 1). 95% CIs of the fitted coefficients were estimated with the *confint* function in R.

398 We used the allometric equations fitted on the accessions to predict the phenotype of the  
399 hybrids from vegetative dry mass  $M$ . We first estimated growth rate of both parents and hybrids  
400 ( $g(M_1)$ ,  $g(M_2)$ ,  $g(M_{1 \times 2})$  with  $M_1$  and  $M_2$  corresponding to vegetative dry mass of worst and best  
401 parent, respectively, and  $M_{1 \times 2}$  to hybrid dry mass). We then predicted mean parental value of  
402 growth rate as  $\text{MP}_{\text{pred}} = (g(M_1) + g(M_2))/2$ , and best parental value as  $\text{BP}_{\text{pred}} = \max(g(M_1), g(M_2))$ .  
403 Finally, we predicted the phenotypic non-linearity as:

404 1) the deviation of predicted hybrid value scaled to predicted mean parental value (Fig. 6A):

$$405 \quad \text{PNL}_{\text{MP}} = (g(M_{1 \times 2}) - \text{MP}_{\text{pred}}) / \text{MP}_{\text{pred}}$$

406 2) the deviation of predicted hybrid value scaled to predicted best parental value (Fig. 6C):

$$407 \quad \text{PNL}_{\text{BP}} = (g(M_{1 \times 2}) - \text{BP}_{\text{pred}}) / \text{BP}_{\text{pred}}$$

408 Both  $\text{PNL}_{\text{MP}}$  and  $\text{PNL}_{\text{BP}}$  were calculated for growth rate, and we performed similarly for  
409 estimating the non-linearity of fruit number (Fig. 6C).

### 410 **Genetic, geographic and phenotypic distances**

411 407 accessions out of the 451 phenotyped here have been genome sequenced  
412 (<http://1001genomes.org/>) [59]. Using vcftools [93], the 12,883,854 single nucleotide  
413 polymorphisms (SNPs) were first filtered to retain those where minor allele frequency was above  
414 5%, with a genotyping rate above 85% across all accessions. This resulted in 391,016 SNPs. We  
415 used PLINK v1.9 [94] to estimate pairwise genetic distances as the number of alleles that  
416 differed between pairs of accessions (*--distance* function), after  $\log_{10}$ -transformation. We also  
417 measured genetic distances using the 1% SNPs with the strongest (positive and negative) effects  
418 on growth rate or fruit number from a previously published study [27]. SNPs effects on each  
419 trait were estimated using a polygenic GWA model implemented in GEMMA ('Bayesian  
420 Sparse Linear Mixed Model', BSLMM) [95].

421 Pairwise geographic distances between accessions were estimated from their longitude-  
422 latitude coordinates [59] and the *distm* function of the *geosphere* package in R. For the  
423 calculation of pairwise phenotypic distances, we first used Euclidean distance among all traits  
424 measured in inbreds (vegetative dry mass, lifespan, growth rate, fruit number; used for Fig. 1).  
425 We also used absolute difference in vegetative dry mass between parents for comparing the  
426 contribution of genetic and phenotypic distances to heterosis in Fig. 5.

## 427 **Statistical analyses**

428 Pearson's method was used for correlation analyses (*cor.test* function in R). Linear regressions  
429 were drawn with Standard Major Axis (SMA, 'smatr' package in R). The effect of the  
430 experiment on trait values was tested on the 16 accessions common to Exp1 and Exp2, using  
431 two-way ANOVA with genotype and experiment as interacting factors. 95% Confidence  
432 Interval (CI) was calculated as 1.96\*Standard Deviation. To calculate the proportion of  
433 phenotypic variance associated with genotypic (G) effects (a measure of broad-sense heritability,  
434  $H^2 = \text{var}(G) / (\text{var}(G) + \text{residuals})$ ), we fitted a mixed model (*lmer* function in R) as  $Y =$   
435 Genotype + residuals, where Y is trait value and Genotype is used as random factor. Statistical  
436 analyses were conducted in R v3.2.3 [92].

## 437 **Availability of data and material**

438 The datasets supporting the conclusions of this article are included within the article and its  
439 additional files. Codes are available on Github  
440 (<https://github.com/fvasseur/AnalysisHeterosis>), and phenotypic data are available on the  
441 Dryad repository (<https://datadryad.org/review?doi=doi:10.5061/dryad.4978rp4>) [96].  
442 Correspondence and requests for materials should be addressed to [weigel@weigelworld.org](mailto:weigel@weigelworld.org) or  
443 [franc.vasseur@gmail.com](mailto:franc.vasseur@gmail.com).

## 444 **Competing interests**

445 The authors declare no competing financial interests.

## 446 **Author Contributions**

447 FV, CV and DW formulated hypotheses and designed the study. FV performed the experiments  
448 and extracted the data. FV, LF and DV performed statistical analyses. All authors interpreted  
449 the results and wrote the paper.

## 450 **Acknowledgements**

451 We thank Christine Dillmann, Alain Charcosset, Olivier Loudet and Thomas Lenormand for  
452 helpful comments about statistical modelling and data interpretation.

## 453 **References**

- 454 1. Melchinger AE. Genetic diversity and heterosis. In: Coors JG, Pandey S, editors. The  
455 genetics and exploitation of heterosis in crops. American Society of Agronomy, Crop  
456 Science Society of America; 1999. pp. 99–118.
- 457 2. Fu D, Xiao M, Hayward A, Jiang G, Zhu L, Zhou Q, et al. What is crop heterosis: new  
458 insights into an old topic. *J Appl Genet*. 2015;56: 1–13.
- 459 3. Charlesworth D, Willis JH. The genetics of inbreeding depression. *Nat Rev Genet*.  
460 2009;10: 783–796.
- 461 4. Zhou G, Chen Y, Yao W, Zhang C, Xie W, Hua J, et al. Genetic composition of yield  
462 heterosis in an elite rice hybrid. *Proc Natl Acad Sci U S A*. 2012;109: 15847–15852.
- 463 5. Garcia AAF, Wang S, Melchinger AE, Zeng Z-B. Quantitative trait loci mapping and the  
464 genetic basis of heterosis in maize and rice. *Genetics*. 2008;180: 1707–1724.
- 465 6. Flint-Garcia SA, Buckler ES, Tiffin P, Ersoz E, Springer NM. Heterosis is prevalent for  
466 multiple traits in diverse maize germplasm. *PLoS One*. 2009;4: e7433.
- 467 7. Barth S, Busimi AK, Friedrich Utz H, Melchinger AE. Heterosis for biomass yield and  
468 related traits in five hybrids of *Arabidopsis thaliana* L. *Heynh*. *Heredity*. 2003;91: 36–42.
- 469 8. Barbosa-Neto JF, Sorrells ME, Cisar G. Prediction of heterosis in wheat using coefficient  
470 of parentage and RFLP-based estimates of genetic relationship. *Genome*. 1996;39: 1142–  
471 1149.
- 472 9. Krieger U, Lippman ZB, Zamir D. The flowering gene SINGLE FLOWER TRUSS drives  
473 heterosis for yield in tomato. *Nat Genet*. 2010;42: 459–463.
- 474 10. Birchler JA, Yao H, Chudalayandi S. Unraveling the genetic basis of hybrid vigor. *Proc*  
475 *Natl Acad Sci U S A*. 2006;103: 12957–12958.
- 476 11. Birchler JA, Auger DL, Riddle NC. In search of the molecular basis of heterosis. *Plant*  
477 *Cell*. 2003;15: 2236–2239.
- 478 12. Chen ZJ. Genomic and epigenetic insights into the molecular bases of heterosis. *Nat Rev*  
479 *Genet*. 2013;14: 471–482.

- 480 13. Seymour DK, Chae E, Grimm DG, Martín Pizarro C, Habring-Müller A, Vasseur F, et al.  
481 Genetic architecture of nonadditive inheritance in *Arabidopsis thaliana* hybrids. *Proc Natl*  
482 *Acad Sci U S A*. 2016;113: E7317–E7326.
- 483 14. Hua J, Xing Y, Wu W, Xu C, Sun X, Yu S, et al. Single-locus heterotic effects and  
484 dominance by dominance interactions can adequately explain the genetic basis of heterosis  
485 in an elite rice hybrid. *Proc Natl Acad Sci U S A*. 2003;100: 2574–2579.
- 486 15. Melchinger AE, Piepho H-P, Utz HF, Muminovic J, Wegenast T, Törjék O, et al. Genetic  
487 basis of heterosis for growth-related traits in *Arabidopsis* investigated by testcross progenies  
488 of near-isogenic lines reveals a significant role of epistasis. *Genetics*. 2007;177: 1827–1837.
- 489 16. Li L, Lu K, Chen Z, Mu T, Hu Z, Li X. Dominance, overdominance and epistasis  
490 condition the heterosis in two heterotic rice hybrids. *Genetics*. 2008;180: 1725–1742.
- 491 17. Li ZK, Luo LJ, Mei HW, Wang DL, Shu QY, Tabien R, et al. Overdominant epistatic loci  
492 are the primary genetic basis of inbreeding depression and heterosis in rice. I. Biomass and  
493 grain yield. *Genetics*. 2001;158: 1737–1753.
- 494 18. Xiao J, Li J, Yuan L, Tanksley SD. Dominance is the major genetic basis of heterosis in  
495 rice as revealed by QTL analysis using molecular markers. *Genetics*. 1995;140: 745–754.
- 496 19. Kaeppeler S. Heterosis: many genes, many mechanisms—end the search for an  
497 undiscovered unifying theory. *ISRN Botany*. 2012;2012.
- 498 20. Lippman ZB, Zamir D. Heterosis: revisiting the magic. *Trends Genet*. 2007;23: 60–66.
- 499 21. Kusterer B, Muminovic J, Utz HF, Piepho H-P, Barth S, Heckenberger M, et al. Analysis  
500 of a triple testcross design with recombinant inbred lines reveals a significant role of  
501 epistasis in heterosis for biomass-related traits in *Arabidopsis*. *Genetics*. 2007;175: 2009–  
502 2017.
- 503 22. Groszmann M, Greaves IK, Fujimoto R, Peacock WJ, Dennis ES. The role of epigenetics  
504 in hybrid vigour. *Trends Genet*. 2013;29: 684–690.
- 505 23. Larièpe A, Mangin B, Jasson S, Combes V, Dumas F, Jamin P, et al. The genetic basis of  
506 heterosis: multiparental quantitative trait loci mapping reveals contrasted levels of apparent  
507 overdominance among traits of agronomical interest in maize (*Zea mays L.*). *Genetics*.  
508 2012;190: 795–811.
- 509 24. Rockman MV. The QTN program and the alleles that matter for evolution: all that's gold  
510 does not glitter. *Evolution*. 2012;66: 1–17.
- 511 25. Kroymann J, Mitchell-Olds T. Epistasis and balanced polymorphism influencing complex  
512 trait variation. *Nature*. 2005;435: 95–98.
- 513 26. Holland JB. Genetic architecture of complex traits in plants. *Curr Opin Plant Biol*. 2007;10:  
514 156–161.
- 515 27. Vasseur F, Exposito-Alonso M, Ayala-Garay OJ, Wang G, Enquist BJ, Vile D, et al.

- 516 Adaptive diversification of growth allometry in the plant *Arabidopsis thaliana*. Proc Natl  
517 Acad Sci U S A. 2018; 201709141.
- 518 28. Burstin J, Charcosset A. Relationship between phenotypic and marker distances:  
519 theoretical and experimental investigations. Heredity. 1997;79.
- 520 29. Charcosset A, Lefort-Buson M, Gallais A. Relationship between heterosis and  
521 heterozygosity at marker loci: a theoretical computation. Theor Appl Genet. 1991;81: 571–  
522 575.
- 523 30. Charcosset A, Essioux L. The effect of population structure on the relationship between  
524 heterosis and heterozygosity at marker loci. Theor Appl Genet. 1994;89: 336–343.
- 525 31. Moll RH, Lonquist JH, Fortuno JV, Johnson EC. The relationship of heterosis and  
526 genetic divergence in maize. Genetics. 1965;52: 139–144.
- 527 32. Xiao J, Li J, Yuan L, McCouch SR, Tanksley SD. Genetic diversity and its relationship to  
528 hybrid performance and heterosis in rice as revealed by PCR-based markers. Theor Appl  
529 Genet. 1996;92: 637–643.
- 530 33. Betran FJ, Ribaut JM, Beck D, De Leon DG. Genetic diversity, specific combining ability,  
531 and heterosis in tropical maize under stress and nonstress environments. Crop Sci. 2003;43:  
532 797–806.
- 533 34. Palacio-Lopez K, Keller SR, Molofsky J. Genomic admixture between locally adapted  
534 populations of *Arabidopsis thaliana* (Mouse ear cress): Evidence of optimal genetic  
535 outcrossing distance. J Hered. 2017;109(1): 38–46.
- 536 35. Cao J, Schneeberger K, Ossowski S, Günther T, Bender S, Fitz J, et al. Whole-genome  
537 sequencing of multiple *Arabidopsis thaliana* populations. Nat Genet. 2011;43: 956–963.
- 538 36. Birchler JA, Yao H, Chudalayandi S, Vaiman D, Veitia RA. Heterosis. Plant Cell. 2010;22:  
539 2105–2112.
- 540 37. Goff SA. A unifying theory for general multigenic heterosis: energy efficiency, protein  
541 metabolism, and implications for molecular breeding. New Phytol. 2011;189: 923–937.
- 542 38. Wright S. Physiological and evolutionary theories of dominance. Am Nat. 1934;68: 24–53.
- 543 39. Kacser H, Burns JA. The molecular basis of dominance. Genetics. 1981;97: 639–666.
- 544 40. Fiévet J, Nidelet T, Dillmann C, de Vienne D. Heterosis is a systemic property emerging  
545 from nonlinear genotype-phenotype relationships: evidence from in vitro genetics and  
546 computer simulations. Front Genet. 2018;9: 159.
- 547 41. Fiévet JB, Dillmann C, de Vienne D. Systemic properties of metabolic networks lead to an  
548 epistasis-based model for heterosis. Theor Appl Genet. 2010;120: 463–473.
- 549 42. Niklas KJ. Plant allometry: the scaling of form and process. University of Chicago Press;  
550 1994.



- 551 43. Kolokotronis T, Van Savage, Deeds EJ, Fontana W. Curvature in metabolic scaling.  
552 Nature. 2010;464: 753–756.
- 553 44. Price CA, Enquist BJ, Savage VM. A general model for allometric covariation in botanical  
554 form and function. Proc Natl Acad Sci U S A. 2007;104: 13204–13209.
- 555 45. West GB, Brown JH, Enquist BJ. The fourth dimension of life: fractal geometry and  
556 allometric scaling of organisms. Science. 1999;284: 1677–1679.
- 557 46. Brown JH, Gillooly JF, Allen AP, Savage VM, West GB. Toward a metabolic theory of  
558 ecology. Ecology. 2004;85: 1771–1789.
- 559 47. Enquist BJ, Niklas KJ. Global allocation rules for patterns of biomass partitioning in seed  
560 plants. Science. 2002;295: 1517–1520.
- 561 48. Kerkhoff AJ, Enquist BJ. Multiplicative by nature: why logarithmic transformation is  
562 necessary in allometry. J Theor Biol. 2009;257: 519–521.
- 563 49. Savage VM, Gillooly JF, Woodruff WH, West GB, Allen AP, Enquist BJ, et al. The  
564 predominance of quarter-power scaling in biology. Funct Ecol. 2004;18: 257–282.
- 565 50. Savage VM, Bentley LP, Enquist BJ, Sperry JS, Smith DD, Reich PB, et al. Hydraulic  
566 trade-offs and space filling enable better predictions of vascular structure and function in  
567 plants. Proc Natl Acad Sci U S A. 2010;107: 22722–22727.
- 568 51. Enquist BJ, Kerkhoff AJ, Stark SC, Swenson NG, McCarthy MC, Price CA. A general  
569 integrative model for scaling plant growth, carbon flux, and functional trait spectra. Nature.  
570 2007;449: 218–222.
- 571 52. Vasseur F, Violle C, Enquist BJ, Granier C, Vile D. A common genetic basis to the origin  
572 of the leaf economics spectrum and metabolic scaling allometry. Ecol Lett. 2012;15: 1149–  
573 1157.
- 574 53. Somerville C, Somerville S. Plant functional genomics. Science. 1999;285: 380–383.
- 575 54. Meyer RC, Törjék O, Becher M, Altmann T. Heterosis of biomass production in  
576 Arabidopsis. Establishment during early development. Plant Physiol. 2004;134: 1813–1823.
- 577 55. Meyer RC, Kusterer B, Lisek J, Steinfath M, Becher M, Scharf H, et al. QTL analysis of  
578 early stage heterosis for biomass in Arabidopsis. Theor Appl Genet. 2010;120: 227–237.
- 579 56. Yang M, Wang X, Ren D, Huang H, Xu M, He G, et al. Genomic architecture of biomass  
580 heterosis in Arabidopsis. Proc Natl Acad Sci U S A. 2017;114(30): 8101–8106.
- 581 57. Abbott RJ, Gomes MF. Population genetic structure and outcrossing rate of *Arabidopsis*  
582 *thaliana* (L.) Heynh. Heredity. 1989;62: 411.
- 583 58. Bomblies K, Yant L, Laitinen RA, Kim S-T, Hollister JD, Warthmann N, et al. Local-scale  
584 patterns of genetic variability, outcrossing, and spatial structure in natural stands of  
585 *Arabidopsis thaliana*. PLoS Genet. 2010;6: e1000890.



- 586 59. 1001 Genomes Consortium. 1135 sequenced natural inbred lines reveal the global pattern  
587 of polymorphism in *Arabidopsis thaliana*. *Cell*. 2016;166: 481–491.
- 588 60. Koornneef M, Reymond M, Alonso-Blanco C. Natural variation in *Arabidopsis thaliana*. In:  
589 Schmidt R, Bancroft I, editors. *Genetics and genomics of the Brassicaceae*. Springer, New  
590 York, NY; 2011. pp. 123–151.
- 591 61. Mitchell-Olds T, Schmitt J. Genetic mechanisms and evolutionary significance of natural  
592 variation in *Arabidopsis*. *Nature*. 2006;441: 947–952.
- 593 62. Bergelson J, Roux F. Towards identifying genes underlying ecologically relevant traits in  
594 *Arabidopsis thaliana*. *Nat Rev Genet*. 2010;11: 867–879.
- 595 63. Weigel D. Natural variation in *Arabidopsis*: from molecular genetics to ecological  
596 genomics. *Plant Physiol*. 2012;158: 2–22.
- 597 64. Chae E, Bomblies K, Kim S-T, Karelina D, Zaidem M, Ossowski S, et al. Species-wide  
598 genetic incompatibility analysis identifies immune genes as hot spots of deleterious  
599 epistasis. *Cell*. 2014;159: 1341–1351.
- 600 65. Bonser SP, Aarssen LW. Allometry and plasticity of meristem allocation throughout  
601 development in *Arabidopsis thaliana*. *J Ecol*. 2001;89: 72–79.
- 602 66. West GB, Brown JH, Enquist BJ. A general model for the structure and allometry of plant  
603 vascular systems. *Nature*. 1999;400: 664–667.
- 604 67. Niklas KJ, Enquist BJ. Invariant scaling relationships for interspecific plant biomass  
605 production rates and body size. *Proc Natl Acad Sci U S A*. 2001;98: 2922–2927.
- 606 68. Xiang C, Zhang H, Wang H, Wei S, Fu B, Xia J, et al. Dissection of heterosis for yield and  
607 related traits using populations derived from introgression lines in rice. *The Crop Journal*.  
608 2016;4: 468–478.
- 609 69. Bomblies K, Lempe J, Epple P, Warthmann N, Lanz C, Dangl JL, et al. Autoimmune  
610 response as a mechanism for a Dobzhansky-Muller-type incompatibility syndrome in  
611 plants. *PLoS Biol*. 2007;5: 1962–1972.
- 612 70. Świadek M, Proost S, Sieh D, Yu J, Todesco M, Jorzig C, et al. Novel allelic variants in  
613 *ACD6* cause hybrid necrosis in local collection of *Arabidopsis thaliana*. *New Phytol*.  
614 2017;213: 900–915.
- 615 71. Todesco M, Kim S-T, Chae E, Bomblies K, Zaidem M, Smith LM, et al. Activation of the  
616 *Arabidopsis thaliana* immune system by combinations of common *ACD6* alleles. *PLoS*  
617 *Genet*. 2014;10: e1004459.
- 618 72. Todesco M, Balasubramanian S, Hu TT, Traw MB, Horton M, Epple P, et al. Natural  
619 allelic variation underlying a major fitness trade-off in *Arabidopsis thaliana*. *Nature*.  
620 2010;465: 632–636.
- 621 73. Grafius JE. The complex trait as a geometric construct. *Heredity*. 1961;16: 225.

- 622 74. Heffner EL, Sorrells ME, Jannink JL. Genomic selection for crop improvement. *Crop Sci.*  
623 2009;49(1): 1–12.
- 624 75. Liu X, Ishiki K, Wang W. Identification of AFLP markers favorable to heterosis in hybrid  
625 rice. *Breed Sci.* 2002;52: 201–206.
- 626 76. Barbosa AMM, Geraldi IO, Benchimol LL, Garcia AAF, Souza CL, Souza AP.  
627 Relationship of intra- and interpopulation tropical maize single cross hybrid performance  
628 and genetic distances computed from AFLP and SSR markers. *Euphytica.* 2003;130: 87–  
629 99.
- 630 77. Arnold SJ. Morphology, performance and fitness. *Integr Comp Biol.* 1983;23: 347–361.
- 631 78. Violle C, Navas ML, Vile D, Kazakou E, Fortunel C, Hummel I, et al. Let the concept of  
632 trait be functional! *Oikos.* 2007;116: 882–892.
- 633 79. Falconer DS. *Introduction to Quantitative Genetics* Ed. 3. Harlow, Essex, UK/New York:  
634 Longmans Green/John Wiley & Sons; 1989.
- 635 80. DeRose MA, Roff DA. A comparison of inbreeding depression in life-history and  
636 morphological traits in animals. *Evolution.* 1999;53: 1288–1292.
- 637 81. Rendel JM. The relationship between gene and phenotype. *J Theor Biol.* 1962;2: 296–308.
- 638 82. Charlesworth D, Charlesworth B. Inbreeding depression and its evolutionary  
639 consequences. *Annu Rev Ecol Syst.* 1987;18: 237–268.
- 640 83. Fisher RA. *The genetical theory of natural selection.* Oxford, England: Clarendon Press;  
641 1930.
- 642 84. Paine CE, Marthews TR, Vogt DR, Purves D, Rees M, Hector A, et al. How to fit  
643 nonlinear plant growth models and calculate growth rates: an update for ecologists.  
644 *Methods Ecol Evol.* 2012;3: 245–256.
- 645 85. Xu S, Zhu D, Zhang Q. Predicting hybrid performance in rice using genomic best linear  
646 unbiased prediction. *Proc Natl Acad Sci U S A.* 2014;111: 12456–12461.
- 647 86. Milla R, Osborne CP, Turcotte MM, Violle C. Plant domestication through an ecological  
648 lens. *Trends Ecol Evol.* 2015;30: 463–469.
- 649 87. Deng J, Zuo W, Wang Z, Fan Z, Ji M, Wang G, et al. Insights into plant size-density  
650 relationships from models and agricultural crops. *Proc Natl Acad Sci U S A.* 2012;109:  
651 8600–8605.
- 652 88. Deng J, Ran J, Wang Z, Fan Z, Wang G, Ji M, et al. Models and tests of optimal density  
653 and maximal yield for crop plants. *Proc Natl Acad Sci U S A.* 2012;109: 15823–15828.
- 654 89. Vasseur F, Wang G, Bresson J, Schwab R, Weigel D. Image-based methods for  
655 phenotyping growth dynamics and fitness in *Arabidopsis thaliana*. *bioRxiv.* 2018. p. 208512.
- 656 90. Conn SJ, Hocking B, Dayod M, Xu B, Athman A, Henderson S, et al. Protocol: optimising

- 657 hydroponic growth systems for nutritional and physiological analysis of *Arabidopsis thaliana*  
658 and other plants. *Plant Methods*. 2013;9: 4.
- 659 91. Rasband WS. 1997–2011. ImageJ. US National Institutes of Health, Bethesda, MD, USA:  
660 <http://imagej.nih.gov/ij>. 2011.
- 661 92. Team RC. R: A language and environment for statistical computing. R foundation for  
662 statistical computing, Vienna, Austria. 2014. ISBN 3-900051-07-0.
- 663 93. Danecek P, Auton A, Abecasis G, Albers CA, Banks E, DePristo MA, et al. The variant  
664 call format and VCFtools. *Bioinformatics*. 2011;27: 2156–2158.
- 665 94. Purcell S, Neale B, Todd-Brown K, Thomas L, Ferreira MAR, Bender D, et al. PLINK: a  
666 tool set for whole-genome association and population-based linkage analyses. *Am J Hum*  
667 *Genet*. 2007;81: 559–575.
- 668 95. Zhou X, Stephens M. Efficient multivariate linear mixed model algorithms for genome-  
669 wide association studies. *Nat Methods*. 2014;11: 407–409.
- 670 96. Greenberg J, White HC, Carrier S, Scherle R. A metadata best practice for a scientific data  
671 repository. *J Libr Metadata*. 2009;9: 194–212.
- 672

673 **Table**

674 **Table 1. Coefficients of fitted allometric relationships.**

| Equation                         |         | Fitted coefficients [95% CI]  |                                  |                                                                                   |
|----------------------------------|---------|-------------------------------|----------------------------------|-----------------------------------------------------------------------------------|
|                                  |         | <i>a</i>                      | <i>b</i>                         | <i>c</i>                                                                          |
| $g(M) = aM^{b+Log(M)}$           | Inbreds | <b>0.022</b><br>[0.011;0.043] | <b>1.479</b><br>[1.248;1.717]    | <b>-0.162</b><br>[-0.208;-0.118]                                                  |
|                                  | Hybrids | <b>0.019</b><br>[0.010;0.037] | <b>1.471</b><br>[1.255;1.694]    | <b>-0.154</b><br>[-0.196;-0.113]                                                  |
| $f(M) = \frac{M}{a + bM + cM^2}$ | Inbreds | <b>0.154</b><br>[0.107;0.210] | <b>0.0022</b><br>[0.0015;0.0029] | <b>1.291 10<sup>-5</sup></b><br>[1.085 10 <sup>-5</sup> ;1.523 10 <sup>-5</sup> ] |
|                                  | Hybrids | <b>0.119</b><br>[0.096;0.144] | <b>0.0025</b><br>[0.0021;0.0030] | <b>1.456 10<sup>-5</sup></b><br>[1.301 10 <sup>-5</sup> ;1.622 10 <sup>-5</sup> ] |

675

## 676 **Figure legends**

677 **Figure 1. Wright's model of physiological dominance.** The metabolic flux along the y axis  
678 exhibits heterosis as a result of non-linear relationship with the concentration of enzymes along  
679 the x axis. This is expected for hybrids (genotype  $Aa$ ) even if the concentration of enzymes is  
680 purely additive, as shown here ( $\bar{X}$  is mean enzyme concentration value between parent 1 ( $aa$ )  
681 and parent 2 ( $AA$ )). Red line represents Michaelis-Menten kinetics of enzyme activity ( $k(X)$ ).

682 **Figure 2. Diversity of genetic crosses used.** (A) Origin of 451 natural inbred accessions (red  
683 dots), and the 450 hybrids between them (blue connecting lines). (B) Relationship between  
684 pairwise genetic distances and pairwise geographic distances. (C) Relationship between pairwise  
685 genetic distances and pairwise phenotypic distances (Euclidean distances). Distance-distance  
686 relationships are represented between all possible pairs of the 451 accessions (101,475  
687 combinations, grey dots) and the crosses used for the 451 phenotyped hybrids (blue dots).

688 **Figure 3. Distributions of traits and proportion of heterosis.** (A) Vegetative dry mass  $M$  in  
689 inbreds (red) and hybrids (blue). Pie chart indicates proportion of crosses without and with  
690 significant heterosis. (B) Plant lifespan. (C) Growth rate. (D) Fruit number.

691 **Figure 4. Allometric relationships of growth rate and fruit number.** (A) Allometric  
692 relationship between growth rate and vegetative plant dry mass,  $M$ , fitted with a power-law  
693 function with mass-corrected exponent ( $g(M)$ ). Equation fitted separately on 451 inbreds (red  
694 dots, solid line) and 447 hybrids (blue dots, dashed line). (B) Allometric relationship between  
695 fruit number and  $M$ , fitted with an inverse polynomial function ( $f(M)$ ). Equation fitted separately  
696 on 441 inbreds (red dots, solid line) and 449 hybrids (blue dots, dashed line).

697 **Figure 5. Correlation of heterosis with genetic and phenotypic distances.** (A) Correlation  
698 between pairwise genetic distances between parental accessions and observed heterosis of  
699 growth rate in hybrids ( $n = 368$ ). (B) Correlation between pairwise phenotypic distances  
700 between parental accessions (absolute difference in  $M$ ) and observed heterosis of growth rate in  
701 hybrids ( $n = 447$ ). (C) Pairwise genetic distances versus heterosis of fruit number ( $n = 368$ ). (D)  
702 Pairwise phenotypic distances versus heterosis of fruit number ( $n = 449$ ). MPH: Mid-Parent  
703 Heterosis (light blue), BPH: Best-parent heterosis (dark blue).  $r^2$  are Pearson's coefficients of

704 correlation (NS: Non-significant, \*\*\*:  $P < 0.001$ ). Regressions lines are SMA, drawn when  
705 significant (solid lines). Red dashed lines represent zero axis.

706 **Figure 6. Prediction of heterosis with phenotypic non-linearity.** (A) Allometric relationship of  
707 growth rate ( $g(M)$ , black solid line) fitted in inbreds, with an example of two parental accessions  
708 (Udul 4-9 and Dra2-1, in red), and their hybrid (in blue). Phenotypic non-linearity (PNL, blue  
709 arrows) was calculated relative to mid-parent value ( $MP_{pred}$ ):  $PNL_{MP} = (g(M_{1x2}) - MP_{pred}) /$   
710  $MP_{pred}$ , and relative to best-parent value ( $BP_{pred}$ ):  $PNL_{BP} = (g(M_{1x2}) - BP_{pred}) / BP_{pred}$ . (B)  
711 Correlation between PNL and heterosis in all hybrids ( $n = 447$ ), both relative to mid- and best-  
712 parent value (MPH in light blue and BPH in dark blue, respectively). (C) Allometric relationship  
713 of fruit number ( $f(M)$ , black solid line) fitted in inbreds, with an example of two parental  
714 accessions (Cdm-0 and Monte-1, in red), and their hybrid (in blue). PNL was calculated relative  
715 to mid-parent value ( $PNL_{MP}$ ) and relative to best-parent value ( $PNL_{BP}$ ). (D) Correlation between  
716 PNL and heterosis in all hybrids ( $n = 447$ ), both relative to MPH (light blue) and BPH (dark  
717 blue). Red dashed lines represent zero axes. Black dashed line represents 1:1 line. Grey dots are  
718 all hybrid individuals. Pictures of plants were taken at harvesting, at the end of reproduction.  $r^2$   
719 are Pearson's coefficients of correlation (NS: Non-significant, \*\*\*:  $P < 0.001$ ).

## 720 **Additional Files**

721 **Additional Table S1. Traits measured in inbred accessions and hybrids of *A. thaliana***

722 **Additional Table S2. Summary statistics of traits measured.**

723 **Additional Table S3. Correlation of heterosis with genetic and phenotypic distances.**

724 **Additional Figure S1. Correlation between predicted and observed hybrid phenotype. (A)**

725 Hybrid growth rate ( $\text{mg d}^{-1}$ ) predicted by phenotypic non-linearity (brown dots) and  
726 genetic additivity (mean growth rate between parents, yellow dots), and compared to  
727 observed hybrid value ( $n = 447$ ). **(B)** Hybrid fruit number predicted by phenotypic non-  
728 linearity (brown dots) and genetic additivity (mean fruit number between parents, yellow  
729 dots), and compared to observed hybrid value ( $n = 449$ ).  $r^2$  are Pearson's coefficients of  
730 correlation (NS: Non-significant, \*\*\*:  $P < 0.001$ ). Dashed line represents 1:1 line.

731 **Additional Figure S2. Crossing and phenotyping conditions. (A)** Seed production experiment

732 performed in 2013 at MPI-Tübingen (Germany). After manual crossing or self-  
733 fertilization, mother flowers were isolated in a small paper bags until fruit ripening.  
734 Seeds for accessions and hybrids used in this study came from the same mother plants.  
735 **(B)** RAPA growth chamber at MPI-Tübingen with trays of accessions phenotyped  
736 during Exp1 in 2014.



**Figure 1.**

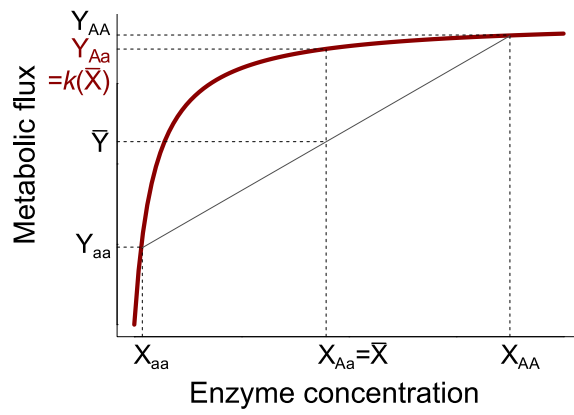

**Figure 2.**

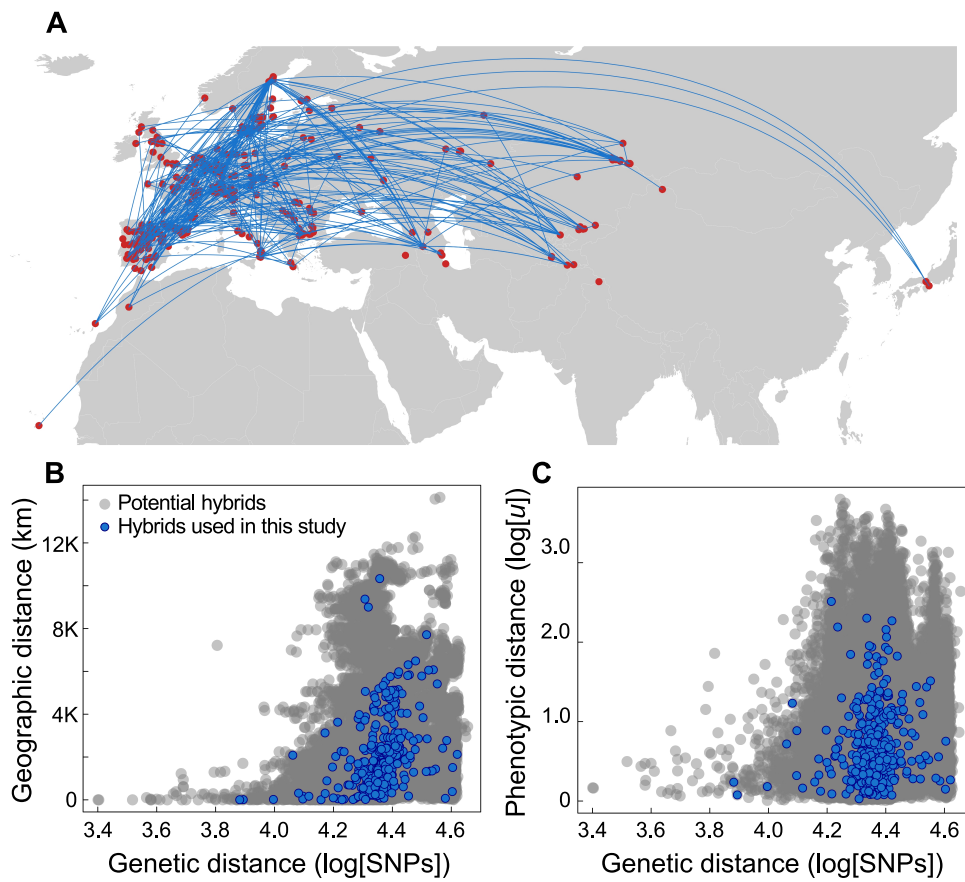

**Figure 3.**

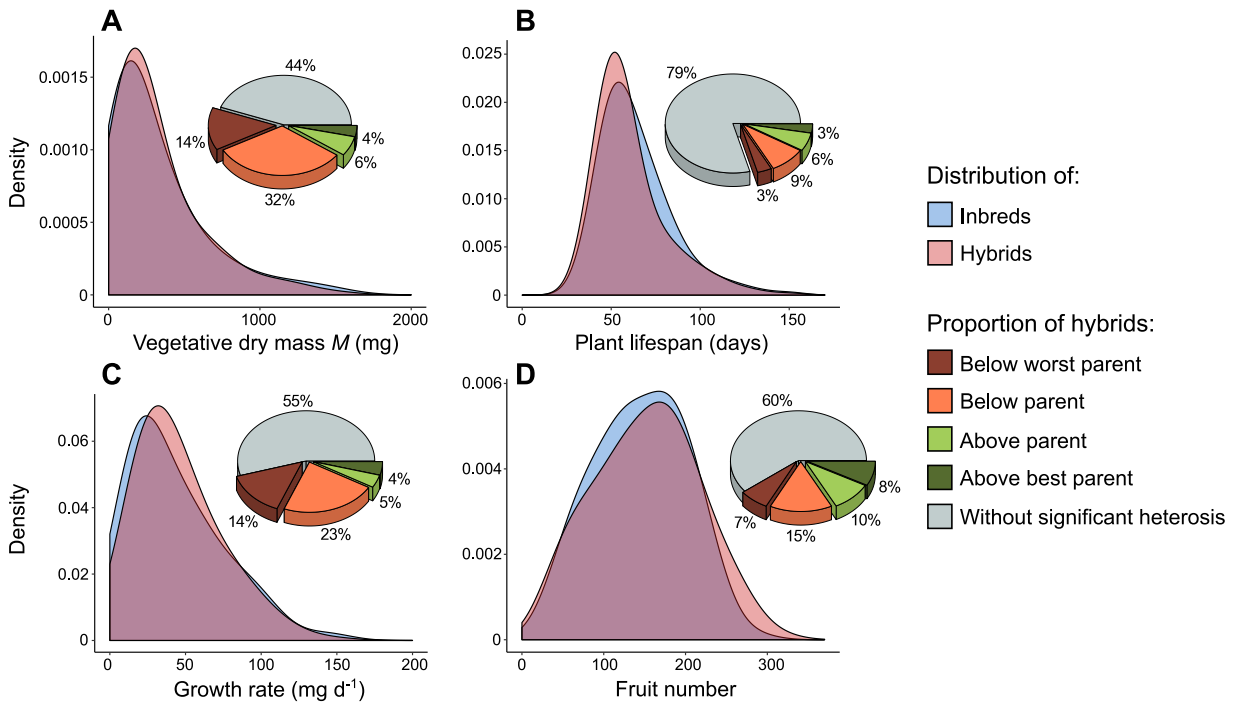

**Figure 4.**

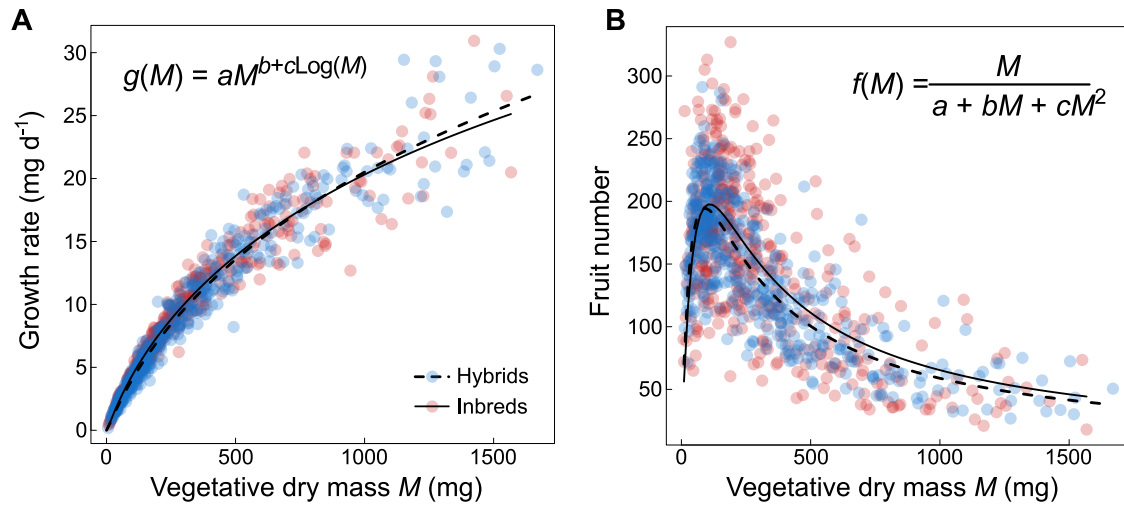

**Figure 5.**

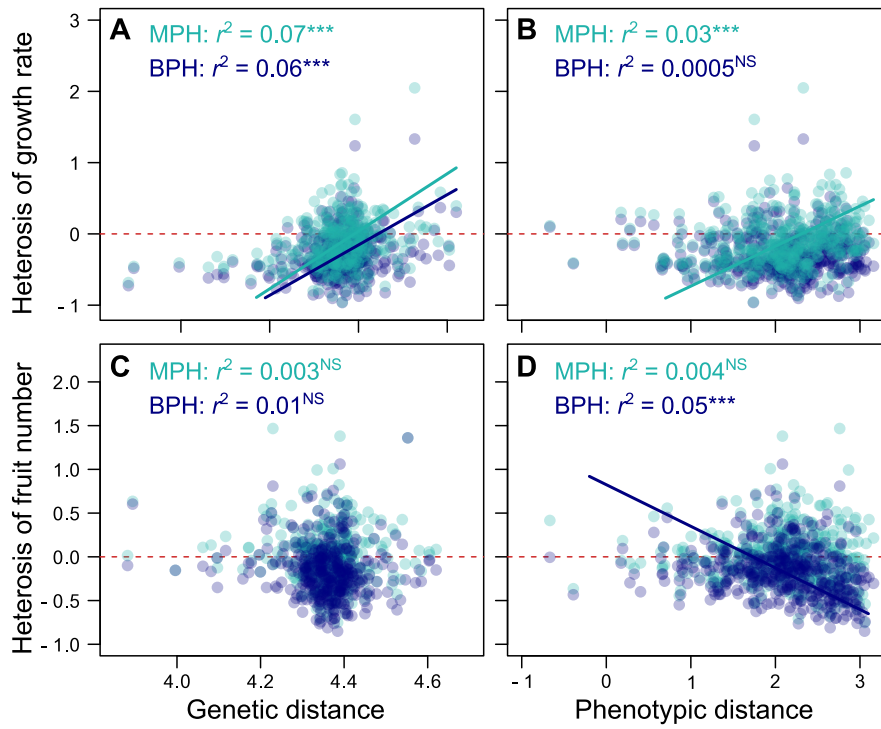

Figure 6.

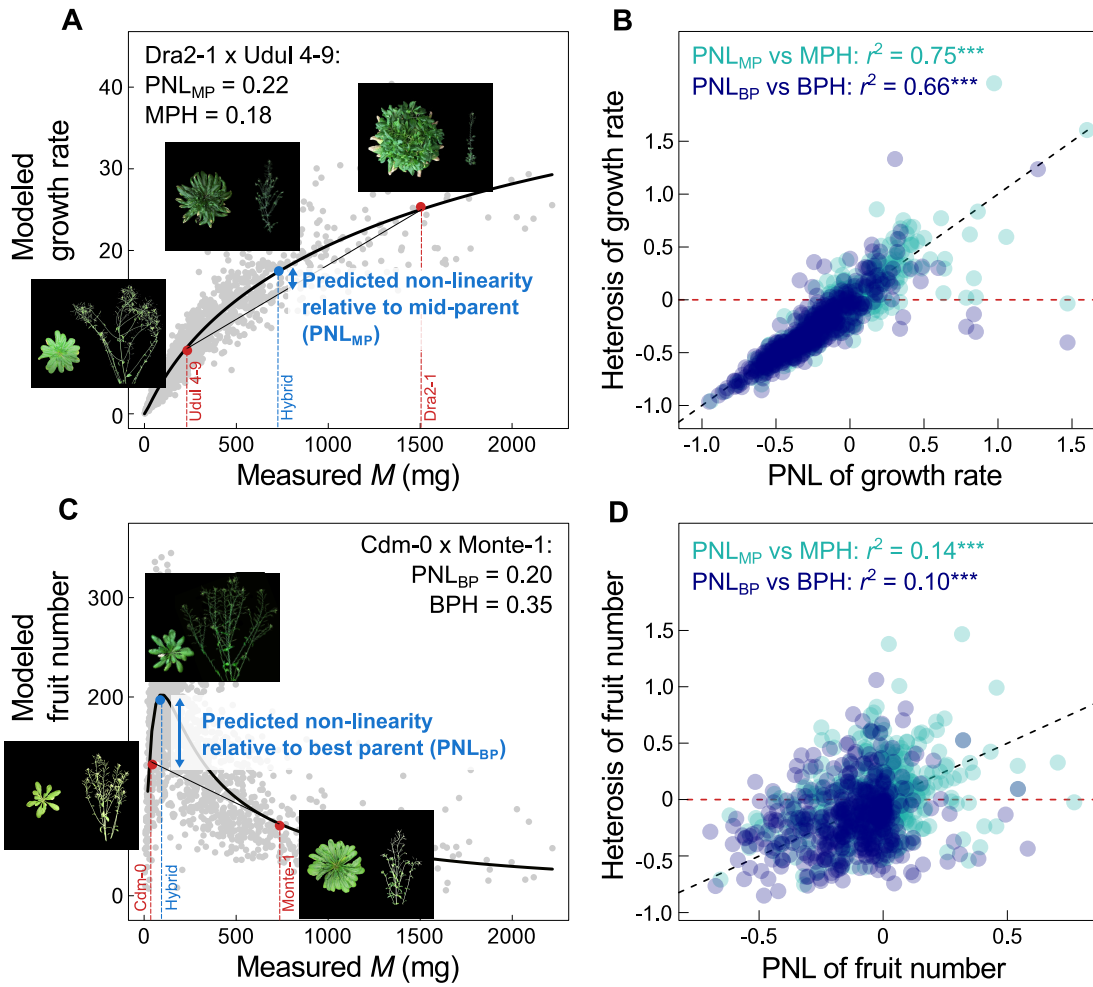

Source: https://www.biorxiv.org/content/10.1101/404616v1.full.pdf
